# Supplementary material for: Controllable synthesis of MoS2@TiO2nanocomposites for visual detection of dopamine secretion with highly-efficient enzymatic activity
Source: Royal Society of Chemistry journal article supplement (doi:10.1039/d3an00089c), 2023-01-01
Supplement: d3an00089c1.pdf [file d3an00089c1.pdf]

## Supporting Information

### **Controllable synthesis of MoS<sub>2</sub>@TiO<sub>2</sub> Nanocomposites for Visual detection of Dopamine Secretion with Highly-efficient Enzymatic Activity**

**Chong Hui Wei<sup>a</sup>, Xuan Xie<sup>b</sup>, Yue Mou<sup>a</sup>, Shiqi Cheng<sup>a</sup>, Jing Yang<sup>a</sup>, Kaixin Xue<sup>a</sup>,  
Kewei Yu<sup>a</sup>, Xinru Lin<sup>a</sup>, Chunfen Zhang<sup>a</sup>, YuJie Zhao<sup>b\*</sup>, Xingyu Luo<sup>a\*</sup>, Yilin  
Wang<sup>a</sup>**

<sup>a</sup>School of Chemistry and Chemical Engineering, Guangxi University, Nanning 530004, P.R. China.

<sup>b</sup>State Key Laboratory of Chemo/Biosensing and Chemometrics, College of Chemistry and Chemical Engineering, Hunan University, Changsha, 410082, P. R. China.

\*Corresponding authors: jamesluoxingyu@163.com (Xingyu Luo); zhaoyujiehnu@163.com (Yujie Zhao)

# Contents

|                                                                        |    |
|------------------------------------------------------------------------|----|
| <b>Additional Experimental Procedures</b> .....                        | 3  |
| Cell culture .....                                                     | 3  |
| Time-lapse confocal imaging .....                                      | 3  |
| Optimization of MoS <sub>2</sub> @TiO <sub>2</sub> NCs catalysis ..... | 3  |
| EPR measurement .....                                                  | 3  |
| Neurotransmitter interference analysis .....                           | 4  |
| <b>Tables and Figures</b> .....                                        | 4  |
| Table S1. ....                                                         | 4  |
| Table S2. ....                                                         | 4  |
| Scheme S1. ....                                                        | 5  |
| Figure S1. ....                                                        | 5  |
| Figure S2. ....                                                        | 6  |
| Figure S3 .....                                                        | 6  |
| Figure S4 .....                                                        | 7  |
| Figure S5 .....                                                        | 7  |
| Figure S6 .....                                                        | 8  |
| Figure S7 .....                                                        | 8  |
| Figure S8. ....                                                        | 9  |
| Figure S9. ....                                                        | 9  |
| Figure S10. ....                                                       | 10 |
| Figure S11. ....                                                       | 10 |
| <b>References</b> .....                                                | 11 |

## Additional Experimental Procedures

**Cell culture.** SH-SY5Y cells were cultured in colorless DMEM (Gibco) supplemented with 10% (v/v) FBS (Gibco), penicillin (100 U/mL) and streptomycin (100  $\mu\text{g}/\text{mL}$ ). All cells were maintained at 37 °C with 5% CO<sub>2</sub> in a humidified atmosphere.

**Time-lapse confocal imaging.** About 10<sup>5</sup> SH-SY5Y cells were cultured in the 35 mm confocal dish in complete medium at 5% CO<sub>2</sub> and 37 °C for another 24 h incubation. 5  $\mu\text{M}$  Fluo-8 were firstly added into the cells for 20 minutes incubation at 37 °C and then washed by PBS buffer for three times. Confocal dish was transferred and fastened under a confocal laser scanning microscope, then the high-K<sup>+</sup> buffer (80 mM KCl, 2 mM CaCl<sub>2</sub>, 50 mM NaCl, 0.7 mM MgCl<sub>2</sub>, 1 mM NaH<sub>2</sub>PO<sub>4</sub>, and 10 mM HEPES) was added into the dish for another 60 s stimulation. The time-lapse imaging was performed using a 488 nm laser for the excitation of Fluo-8. The fluorescence was collected at the corresponding fluorescent channels consecutively with an interval of 60 s and the images were processed using ImageJ software.

**Optimization of MoS<sub>2</sub>@TiO<sub>2</sub> NCs catalysis.** For optimizing the concentration of MoS<sub>2</sub>@TiO<sub>2</sub> NCs, different concentration of MoS<sub>2</sub>@TiO<sub>2</sub> NCs ranging from 0.005 to 0.0275 mg/mL, 20  $\mu\text{L}$  H<sub>2</sub>O<sub>2</sub> (1 M), and 200  $\mu\text{L}$  TMB (10 mM) were mixed in a 2 mL reaction buffer (1 $\times$ , 0.1 M citrate-sodium citrate, pH 4.0). For optimizing the concentration of TMB, different concentration of TMB ranging from 0.25 to 1.4 mM, 20  $\mu\text{L}$  H<sub>2</sub>O<sub>2</sub> (1 M), and 90  $\mu\text{L}$  MoS<sub>2</sub>@TiO<sub>2</sub> NCs (0.5 mg/mL) were mixed in a 2 mL reaction buffer (1 $\times$ , 0.1 M citrate-sodium citrate, pH 4.0). For optimizing the concentration of H<sub>2</sub>O<sub>2</sub>, different concentration of H<sub>2</sub>O<sub>2</sub> ranging from 0 to 35 mM, 200  $\mu\text{L}$  TMB (10 mM), and 90  $\mu\text{L}$  MoS<sub>2</sub>@TiO<sub>2</sub> NCs (0.5 mg/mL) were mixed in a 2 mL reaction buffer (1 $\times$ , 0.1 M citrate-sodium citrate, pH 4.0). The pH optimization of reaction solution is measured under the optimal reaction conditions. In particular,  $\Delta Abs = A_I - A_0$ ,  $A_I$  represents the maximum absorbance at the wavelength of 652 nm,  $A_0$  represents the background absorbance at the wavelength of 652 nm. All reaction solutions were incubated at 30 °C for 30 minutes and recorded by UV-4802 spectrophotometer.

**EPR measurement.** 90  $\mu\text{L}$  MoS<sub>2</sub>@TiO<sub>2</sub> NCs (0.5mg/mL) with or without 200  $\mu\text{M}$  DA were mixed with the 10 mM H<sub>2</sub>O<sub>2</sub> and 300 mM DMPO in a 2 mL reaction buffer (1 $\times$ , 0.1 M citrate-sodium citrate, pH 4.0) for 10 min incubation. All Spectrum was

recorded by using the EPR spectrometer A300-10/12 (Bruker, German).

**Neurotransmitter interference analysis.** 90  $\mu\text{L}$   $\text{MoS}_2@\text{TiO}_2$  NCs (0.5 mg/mL), 40  $\mu\text{L}$  DA (10 mM) and 40  $\mu\text{L}$  other neurotransmitters (10 mM) were mixed with 20  $\mu\text{L}$   $\text{H}_2\text{O}_2$  (1 M) and 200  $\mu\text{L}$  TMB (10 mM) in 2 mL reaction buffer (1 $\times$ , 0.1 M citrate-sodium citrate, pH 4.0). The mixtures were incubated at 30  $^\circ\text{C}$  for 30 min and then recorded the absorption value at the wavelength of 652 nm by UV-4802 spectrophotometer (Unico Co., Ltd., Shanghai, China).

**Table S1.** Comparison of steady state kinetics with  $\text{MoS}_2$  and natural enzyme HRP.

| Catalyst                                          | Substance              | $K_m$ [mM] | $V_{max}$ [ $\text{Ms}^{-1}$ ] | Reference          |
|---------------------------------------------------|------------------------|------------|--------------------------------|--------------------|
| <b>HRP</b>                                        | TMB                    | 3.95       | $37.7 \times 10^{-8}$          | (Feng et al. 2013) |
|                                                   | $\text{H}_2\text{O}_2$ | 10.4       | $0.689 \times 10^{-8}$         |                    |
| <b><math>\text{MoS}_2</math></b>                  | TMB                    | 0.88       | $1.13 \times 10^{-8}$          | Present work       |
|                                                   | $\text{H}_2\text{O}_2$ | 7.85       | $1.04 \times 10^{-8}$          |                    |
| <b><math>\text{MoS}_2@\text{TiO}_2</math> NCs</b> | TMB                    | 0.56       | $2.31 \times 10^{-8}$          | Present work       |
|                                                   | $\text{H}_2\text{O}_2$ | 2.77       | $1.90 \times 10^{-8}$          |                    |

**Table S2.** Comparison with reported colorimetric methods for DA detection.

| Material                                                 | Methods     | Linear range ( $\mu\text{M}$ ) | LOD ( $\mu\text{M}$ ) | Reference                 |
|----------------------------------------------------------|-------------|--------------------------------|-----------------------|---------------------------|
| <b>Por-CuCo<sub>2</sub>O<sub>4</sub></b>                 | Colorimetry | 0-100                          | 0.94                  | (He et al. 2021)          |
| <b>AHMT-AuNPs</b>                                        | Colorimetry | 0.20-1.10                      | 0.07                  | (Fan et al. 2016)         |
| <b>Silver nanoparticles</b>                              | Colorimetry | 0.2-30                         | 0.2                   | (Rithesh Raj et al. 2016) |
| <b>Cu-Mn-O/C-dots</b>                                    | Colorimetry | 0-75                           | 0.5                   | (Wang et al. 2019)        |
| <b>Pt/CoSn(OH)<sub>6</sub> NCs</b>                       | Colorimetry | 5-60                           | 0.76                  | (Liu et al. 2019)         |
| <b>Ru<sub>0.3</sub>Co<sub>2.7</sub>O<sub>4</sub> NPs</b> | Colorimetry | 0-16                           | 0.1                   | (Wen et al. 2022)         |
| <b><math>\text{MoS}_2@\text{TiO}_2</math> NCs</b>        | Colorimetry | 0-100                          | 0.194                 | present work              |

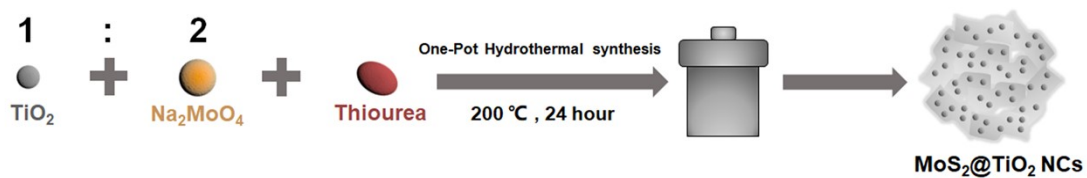

**Scheme S1.** Schematic illustration of the one-pot hydrothermal procedure for  $\text{MoS}_2@\text{TiO}_2$  NCs preparation.

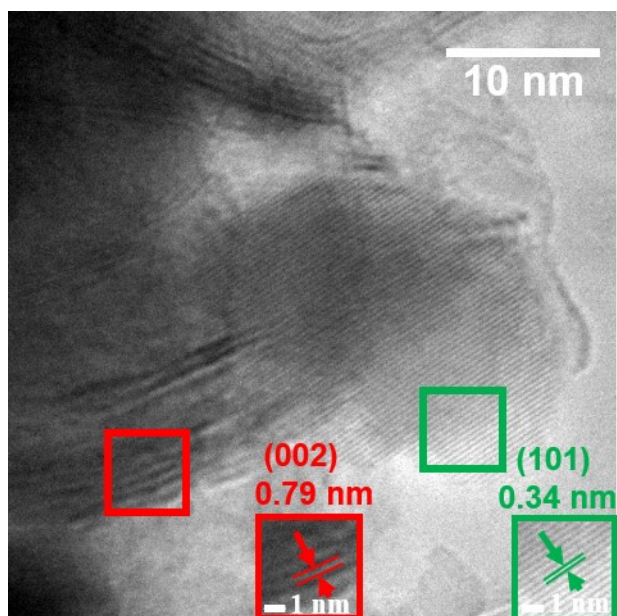

**Figure S1.** High-resolution TEM images for the lattice distance of  $\text{TiO}_2$  and  $\text{MoS}_2$ , the scale bar of insert image: 1 nm. The scale bar for TEM image is 10 nm.

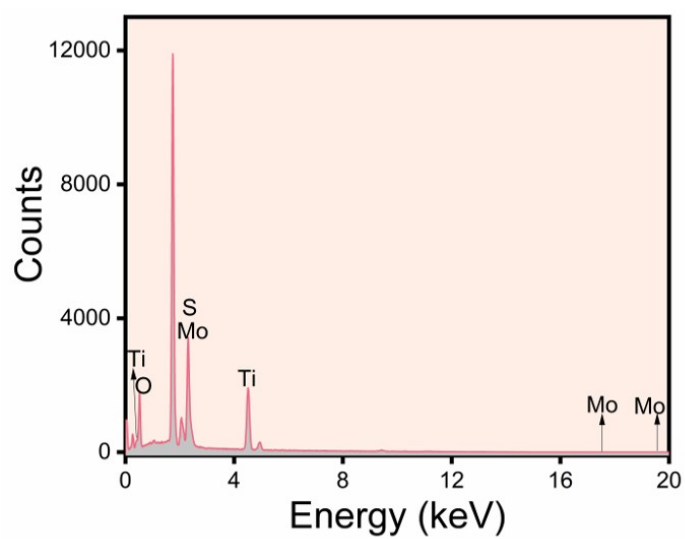

**Figure S2.** (A) EDS characterization for elements verification in MoS<sub>2</sub>@TiO<sub>2</sub> NCs.

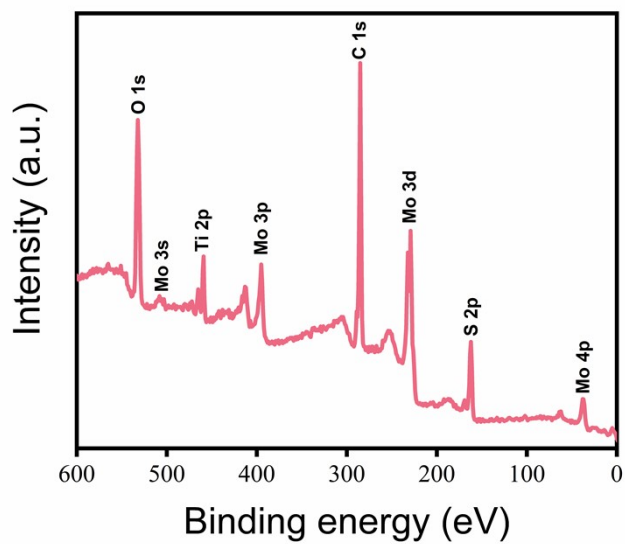

**Figure S3.** The XPS full pattern of MoS<sub>2</sub>@TiO<sub>2</sub> NCs.

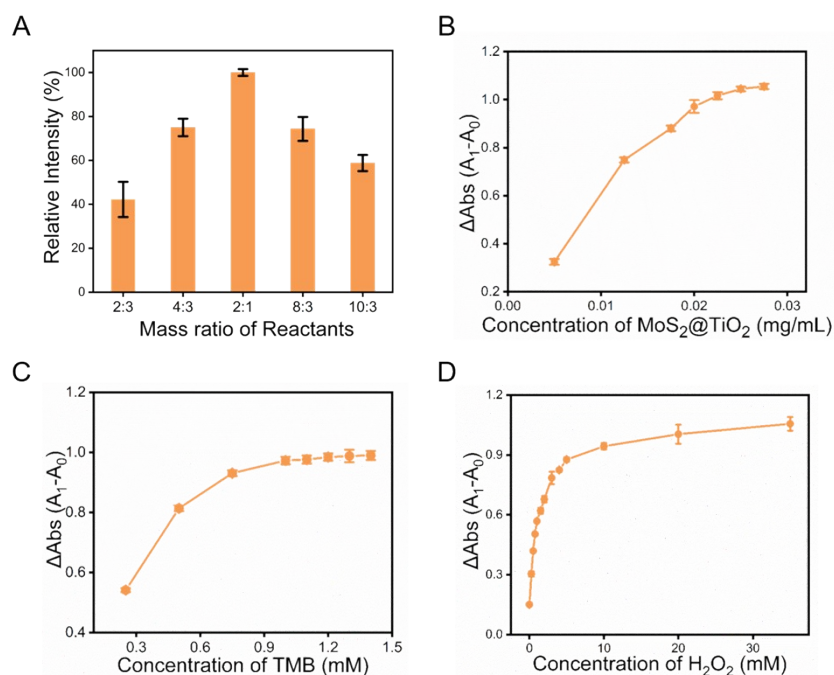

**Figure S4.** Optimization experiments for (A) the comparison of the catalytic activities with different mass ratio of the reactants between Na<sub>2</sub>MoO<sub>4</sub>·2H<sub>2</sub>O and TiO<sub>2</sub>. (B) the concentration of MoS<sub>2</sub>@TiO<sub>2</sub> NCs ranging from 0.005 to 0.0275 mg/mL. (C) the concentration of TMB ranging from 0.25 to 1.4 mM. (D) the concentration of H<sub>2</sub>O<sub>2</sub> ranging from 0 to 35 mM.

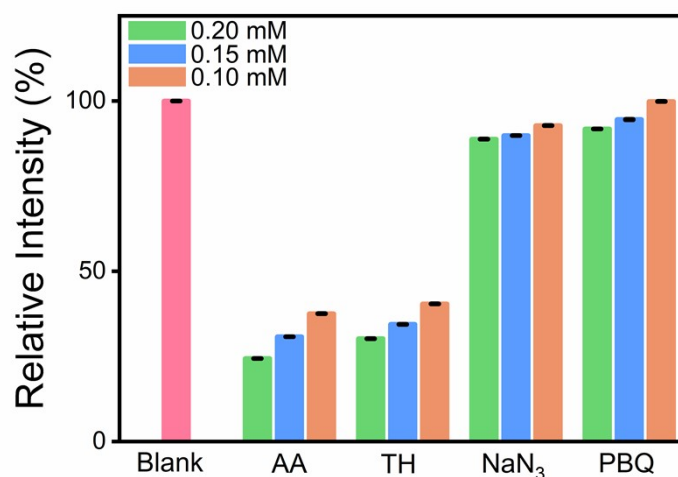

**Figure S5.** The MoS<sub>2</sub>@TiO<sub>2</sub> NCs catalysis at the presence of different radical scavengers. Different concentration of radical scavengers including AA, TH, NaN<sub>3</sub> and PBQ were mixed with 90 μL MoS<sub>2</sub>@TiO<sub>2</sub> NCs (0.5 mg/mL), 20 μL H<sub>2</sub>O<sub>2</sub> (1 M) and 200 μL TMB (10 mM) in a 2 mL reaction buffer (1×, 0.1 M citrate-sodium citrate, pH 4.0). Each absorbance at 652 nm was recorded to calculate the scavenging efficiency, respectively.

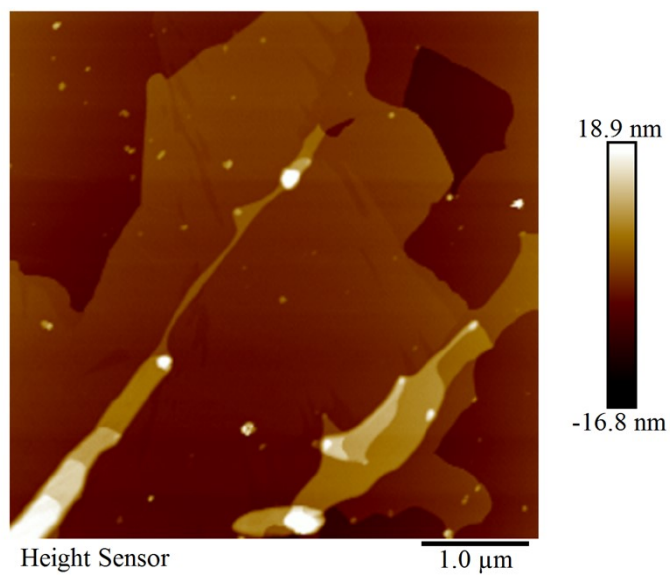

**Figure S6.** The atomic force microscope (AFM) image of synthesized sheet-like MoS<sub>2</sub> with the same procedure.

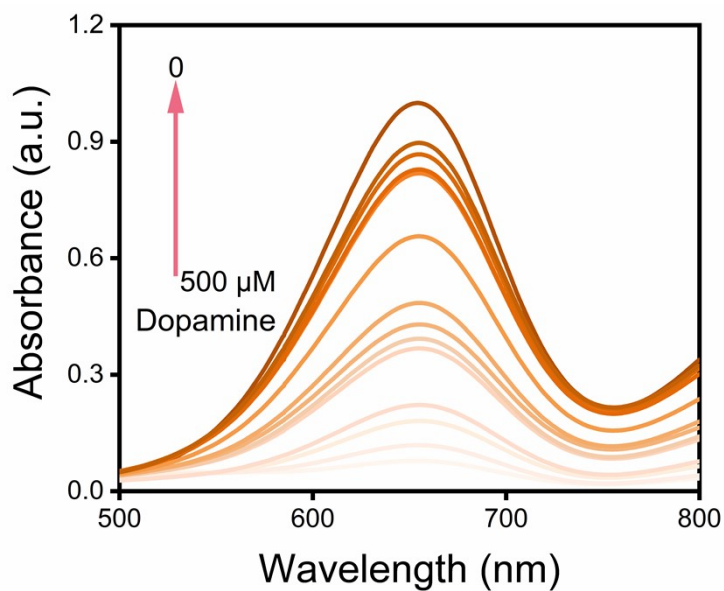

**Figure S7.** The UV-vis titration spectrum of TMB oxidation by MoS<sub>2</sub>@TiO<sub>2</sub> NCs catalysis with different concentrations of DA.



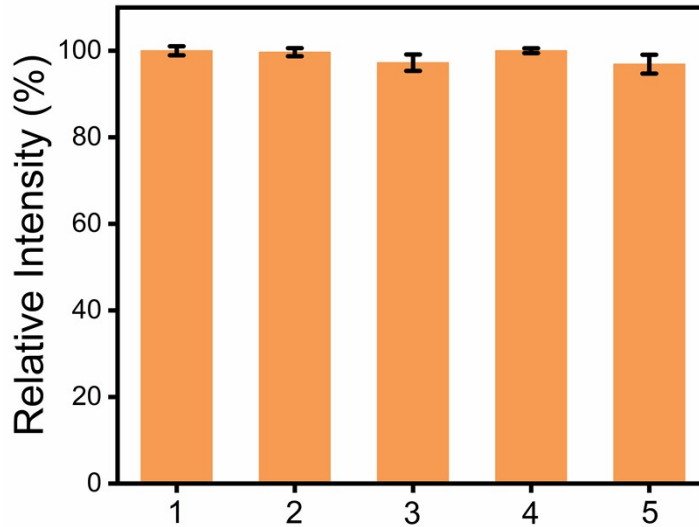

**Figure S8.** The relative intensity of MoS<sub>2</sub>@TiO<sub>2</sub> NCs catalysis in different solution environment with the same concentration of H<sub>2</sub>O<sub>2</sub> 10 mM, TMB 1 mM, 90μL MoS<sub>2</sub>@TiO<sub>2</sub> NCs (0.5 mg/mL). **1:** Blank (in citrate-sodium citrate buffer), **2:** Colorless medium, **3:** High-K<sup>+</sup> buffer (80 mM KCl, 2 mM CaCl<sub>2</sub>, 50 mM NaCl, 0.7 mM MgCl<sub>2</sub>, 1 mM NaH<sub>2</sub>PO<sub>4</sub>, and 10 mM HEPES), **4:** Reaction buffer without K<sup>+</sup> (2 mM CaCl<sub>2</sub>, 50 mM NaCl, 0.7 mM MgCl<sub>2</sub>, 1 mM NaH<sub>2</sub>PO<sub>4</sub>, and 10 mM HEPES). **5:** PBS buffer (1×, 4.2 mM KCl, 2 mM CaCl<sub>2</sub>, 140 mM NaCl, 0.7 mM MgCl<sub>2</sub>, 1 mM NaH<sub>2</sub>PO<sub>4</sub>).

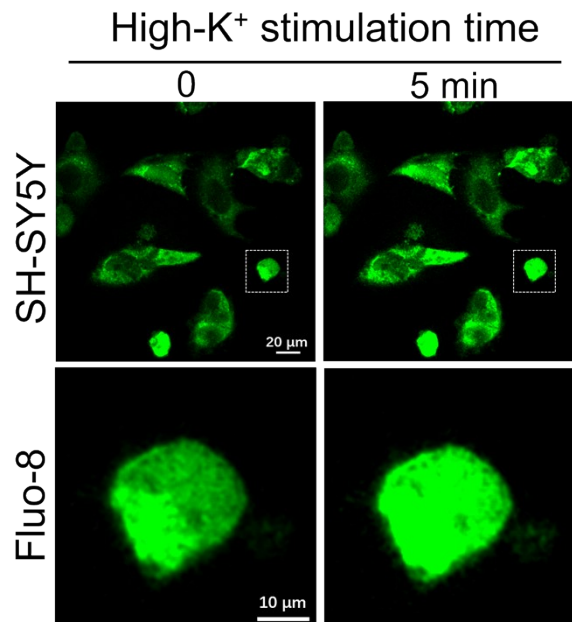

**Figure S9.** Time-lapse confocal imaging of SH-SY5Y cells with or without High-K<sup>+</sup> buffer stimulation and then incubated with 5 μM Fluo-8, scale bar: 20 μm. The zoom-in images are lighted by 5 μM Fluo-8 to trace the calcium flux, scale bar: 10 μm.

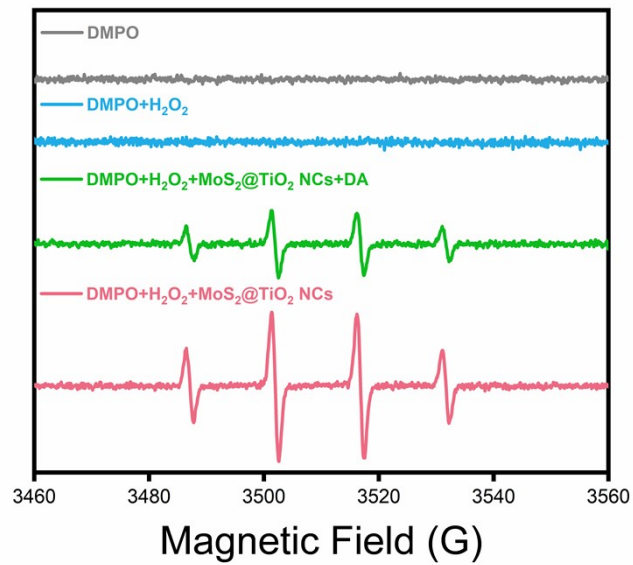

**Figure S10.** EPR measurement of captured  $\cdot\text{OH}$  that catalyzed by MoS<sub>2</sub>@TiO<sub>2</sub> NCs and the  $\cdot\text{OH}$  competition by DA.

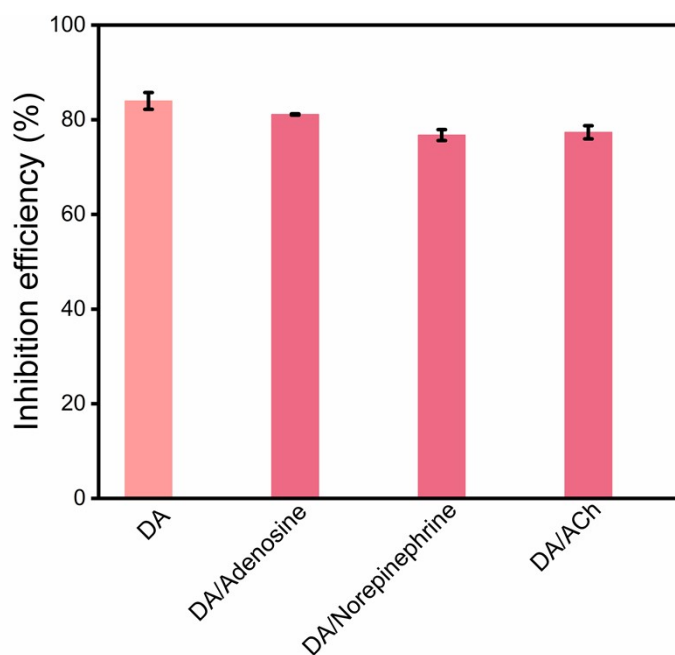

**Figure S11.** The inhibition efficiency of DA with coexisting other types of neurotransmitters, the concentration of DA and the other neurotransmitters are 200  $\mu\text{M}$ .

## References:

- Fan, K., Wang, H., Xi, J., Liu, Q., Meng, X., Duan, D., Gao, L., Yan, X., 2016. Optimization of Fe<sub>3</sub>O<sub>4</sub> nanozyme activity via single amino acid modification mimicking an enzyme active site. *Chem Commun (Camb)* 53(2), 424-427. <https://doi.org/10.1039/c6cc08542c>
- Feng, J.J., Guo, H., Li, Y.F., Wang, Y.H., Chen, W.Y., Wang, A.J., 2013. Single molecular functionalized gold nanoparticles for hydrogen-bonding recognition and colorimetric detection of dopamine with high sensitivity and selectivity. *ACS Appl Mater Interfaces* 5(4), 1226-1231. <https://doi.org/10.1021/am400402c>
- He, Y., Li, N., Liu, X., Chen, W., Zhu, X., Liu, Q., 2021. 5,10,15,20-tetrakis (4-carboxyl phenyl) porphyrin-functionalized urchin-like CuCo<sub>2</sub>O<sub>4</sub> as an excellent artificial nanozyme for determination of dopamine. *Mikrochim Acta* 188(5), 171. <https://doi.org/10.1007/s00604-021-04819-9>
- Liu, H., Ding, Y.N., Bian, B., Li, L., Li, R., Zhang, X., Liu, Z., Zhang, X., Fan, G., Liu, Q., 2019. Rapid colorimetric determination of dopamine based on the inhibition of the peroxidase mimicking activity of platinum loaded CoSn(OH)<sub>6</sub> nanocubes. *Mikrochim Acta* 186(12), 755. <https://doi.org/10.1007/s00604-019-3940-5>
- Rithesh Raj, D., Prasanth, S., Vineeshkumar, T.V., Sudarsanakumar, C., 2016. Surface plasmon resonance based fiber optic dopamine sensor using green synthesized silver nanoparticles. *Sensors and Actuators B: Chemical* 224, 600-606. <https://doi.org/10.1016/j.snb.2015.10.106>
- Wang, J., Du, R., Liu, W., Yao, L., Ding, F., Zou, P., Wang, Y., Wang, X., Zhao, Q., Rao, H., 2019. Colorimetric and fluorometric dual-signal determination of dopamine by the use of Cu-Mn-O microcrystals and C-dots. *Sensors and Actuators B: Chemical* 290, 125-132. <https://doi.org/10.1016/j.snb.2019.03.107>
- Wen, F., Jiang, T., He, L., Su, J., Jiang, P., He, D., Chen, Z., 2022. Ru incorporation for boosting Co<sub>3</sub>O<sub>4</sub> oxidase-like activity in dopamine colorimetric detection. *Applied Surface Science* 603, 154434. <https://doi.org/10.1016/j.apsusc.2022.154434>
